# Supplementary material for: Clinical Characteristics, Management, and In-Hospital Outcomes in Patients With Stroke or Transient Ischemic Attack in China
Source: PubMed Central journal article supplement (PMC8363916; doi:10.1001/jamanetworkopen.2021.20745), 2021-08-13
Supplement: jamanetwopen-e2120745-s001.pdf [file jamanetwopen-e2120745-s001.pdf]

## Supplementary Online Content

Gu HQ, Yang X, Wang CJ, et al. Clinical characteristics, management, and in-hospital outcomes in patients with stroke or transient ischemic attack in China. *JAMA Netw Open*. 2021;4(8):e2120745. doi:10.1001/jamanetworkopen.2021.20745

**eMethods.** Participating Hospitals in CSCA

**eFigure 1.** Participants and Hospitals Distribution in CSCA

**eFigure 2.** Patients Enrollment Chart

**eFigure 3.** Participants Enrollment in CSCA by Quarter

**eTable 1.** Distribution of Participating Hospital in CSCA

**eTable 2.** Specifications of Guideline-Recommended Performance Measures

**eTable 3.** Trend Analysis of Quality Measurement

**eTable 4.** Trend Analysis of In-Hospital Outcomes

**eTable 5.** Variations of Performance Measures at Hospital Level

**eTable 6.** Variations of Stroke-Related In-Hospital Outcomes and Complications at Hospital Level

**eTable 7.** Performance Measures by Localization

**eTable 8.** Stroke-Related In-Hospital Outcomes and Complications by Localization

This supplementary material has been provided by the authors to give readers additional information about their work.

### **eMethods 1. Participating hospitals in CSCA**

CSCA was made available to all secondary and tertiary hospitals in China. Secondary hospitals are regional hospitals with 100 to 500 beds that provide comprehensive medical care, as well as medical education and medical research on a regional basis. Secondary hospitals are usually located in a medium-sized city, county, or district. Tertiary hospitals are usually located in city centers with more than 500 beds, and they serve as medical hubs for multiple regions, with comprehensive and specialized medical care being provided. Hospitals participating in CSCA covered every province of China. Detailed distribution can be found in eFigure 1 and eTable 1.

**eFigure 1. Participants and hospitals distribution in CSCA**

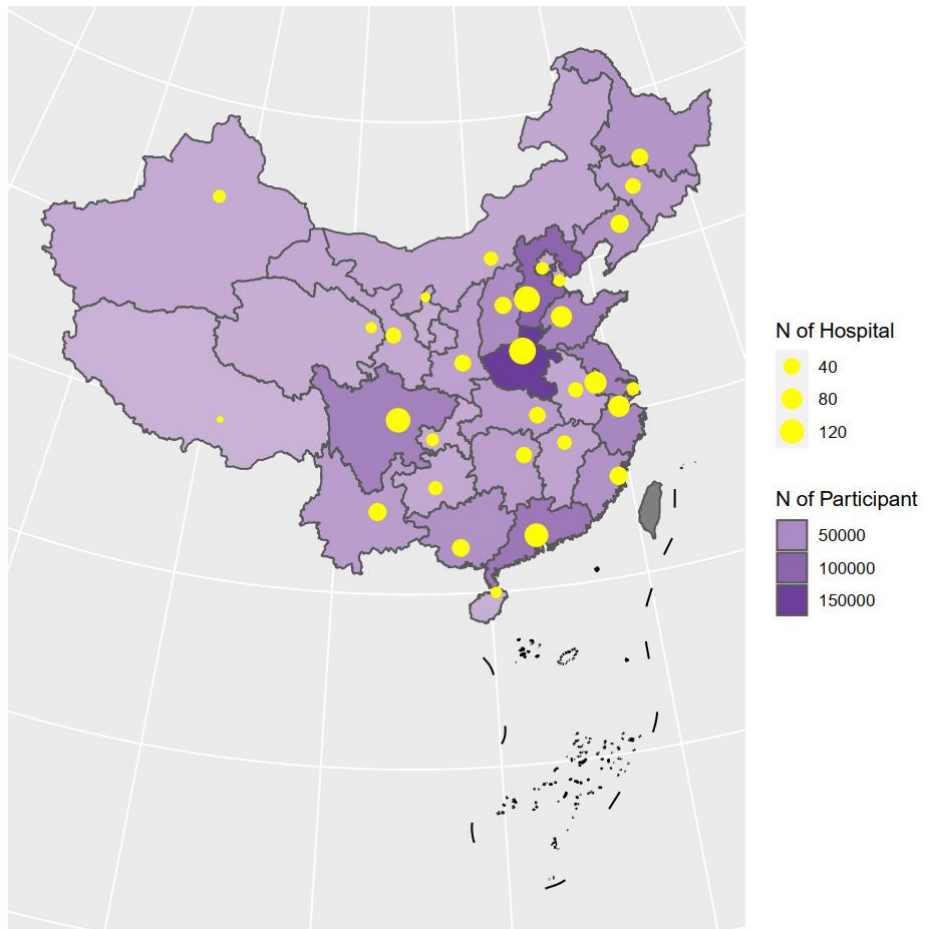

Abbreviations: CSCA indicates The Chinese Stroke Center Alliance.

**eFigure 2. Patients enrollment chart**

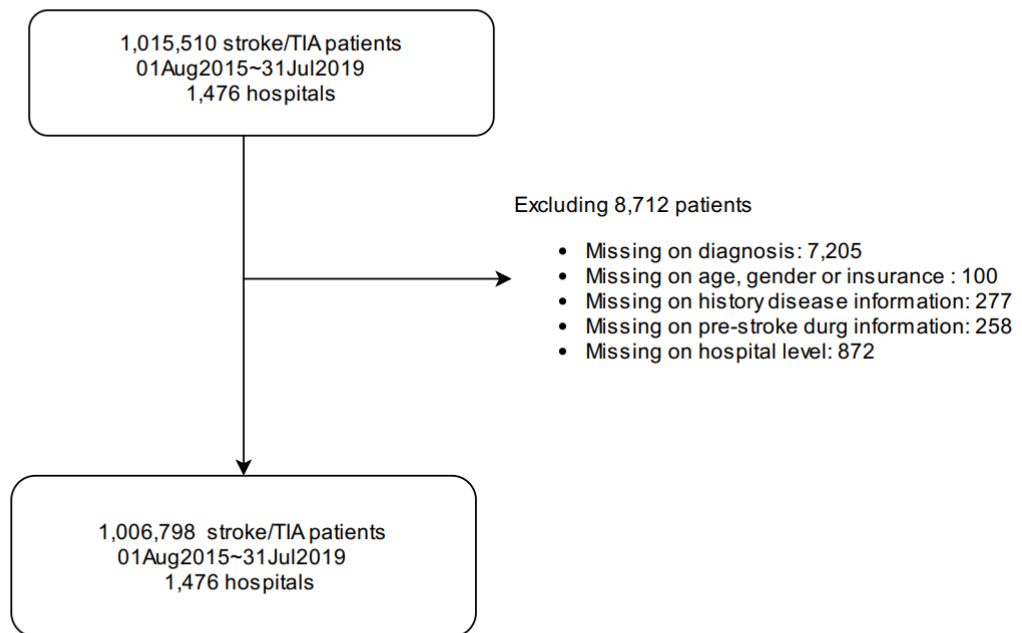

Abbreviations: TIA indicates transient ischemic stroke

**eFigure 3. Participants enrollment in CSCA by quarter**

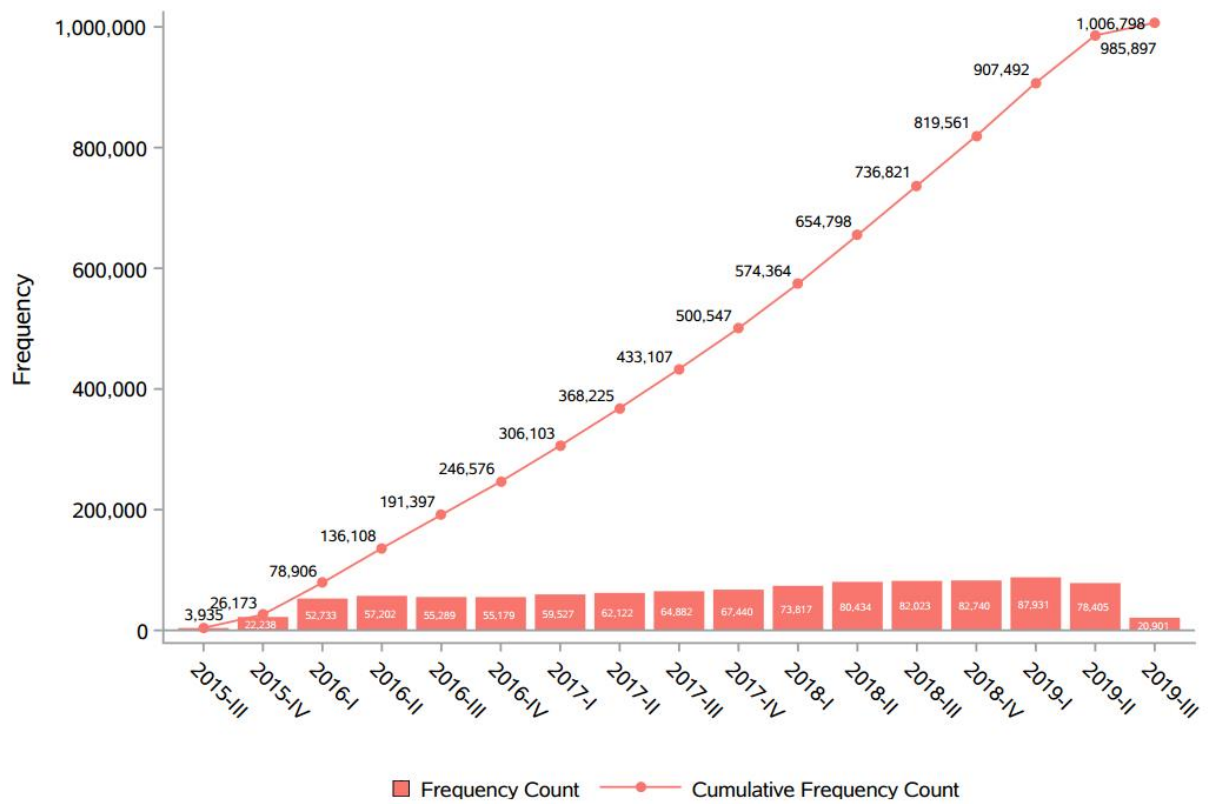

Abbreviations: CSCA indicates the Chinese Stroke Center Alliance.

**eTable 1. Distribution of participating hospital in CSCA**

| Area           | n (%)*<br>for secondary hospital | n (%)*<br>for Tertiary hospital |
|----------------|----------------------------------|---------------------------------|
| Anhui          | 15 (4.3)                         | 14 (20.6)                       |
| Beijing        | 5 (3.6)                          | 11 (11.1)                       |
| Fujian         | 19 (9.7)                         | 33 (47.1)                       |
| Gansu          | 20 (10.9)                        | 14 (38.9)                       |
| Guangdong      | 32 (7.1)                         | 81 (47.6)                       |
| Guangxi        | 19 (7.8)                         | 30 (41.7)                       |
| Guizhou        | 10 (3.5)                         | 13 (26)                         |
| Hainan         | 3 (7.7)                          | 7 (41.2)                        |
| Hebei          | 110 (21.6)                       | 33 (47.8)                       |
| Henan          | 122 (26)                         | 35 (40.2)                       |
| Heilongjiang   | 14 (4.1)                         | 27 (28.4)                       |
| Hubei          | 15 (4.8)                         | 24 (19.5)                       |
| Hunan          | 18 (5.2)                         | 19 (26)                         |
| Jilin          | 12 (5.5)                         | 21 (45.7)                       |
| Jiangsu        | 39 (10.9)                        | 54 (35.1)                       |
| Jiangxi        | 12 (5.3)                         | 13 (19.7)                       |
| Liaoning       | 22 (7.3)                         | 31 (24.2)                       |
| Inner Mongolia | 5 (1.7)                          | 18 (25)                         |
| Ningxia        | 0 (0)                            | 5 (38.5)                        |
| Qinghai        | 1 (1.1)                          | 8 (44.4)                        |
| Shandong       | 48 (8.1)                         | 33 (19.9)                       |
| Shanxi         | 26 (7.4)                         | 18 (31)                         |
| Shaanxi        | 18 (5.2)                         | 23 (40.4)                       |
| Shanghai       | 7 (6.7)                          | 9 (19.1)                        |
| Sichuan        | 43 (7.4)                         | 82 (53.9)                       |
| Tianjing       | 6 (8.2)                          | 7 (16.7)                        |
| Tibet          | 0 (0)                            | 1 (9.1)                         |
| Xingjiang      | 10 (4.3)                         | 7 (18.4)                        |
| Yunan          | 32 (9.4)                         | 20 (29)                         |
| Zhejiang       | 28 (12.3)                        | 58 (43.6)                       |
| Chongqing      | 9 (6.3)                          | 7 (17.1)                        |

\* % was calculated based on hospital data of *China Health and Family Planning Statistics*

*Yearbook 2018*

**eTable 2. Specifications of guideline-recommended performance measures**

| Performance measure of ischemic stroke care                                    | Performance measure definition for eligible patients                                                                                                                                         |
|--------------------------------------------------------------------------------|----------------------------------------------------------------------------------------------------------------------------------------------------------------------------------------------|
| Admission performance measures                                                 |                                                                                                                                                                                              |
| IV-rtPA < 4.5 Hours                                                            | Intravenous recombinant tissue plasminogen activator (IV rtPA) in patients who arrive within 3.5 hours after initial symptom onset and treated within 4.5 hours                              |
| Early antithrombotics                                                          | Antithrombotic therapy prescribed within 2 days of hospitalization, including antiplatelet or anticoagulant therapy                                                                          |
| DVT prophylaxis                                                                | Patients at risk for deep vein thrombosis (DVT) (non-ambulatory) who received DVT prophylaxis by end of hospital day two, including pneumatic compression, warfarin sodium or heparin sodium |
| Dysphagia screening                                                            | Dysphagia screening prior to any oral intake                                                                                                                                                 |
| Rehabilitation assessment                                                      | Assessed for stroke rehabilitation services                                                                                                                                                  |
| Performance measures at discharge                                              |                                                                                                                                                                                              |
| Antithrombotic medication                                                      | Antithrombotic therapy prescribed at discharge                                                                                                                                               |
| Anticoagulation for atrial fibrillation                                        | Anticoagulation prescribed at discharge for patients with atrial fibrillation or atrial flutter documented during the hospitalization                                                        |
| Antihypertensive medicines for patients with hypertension                      | Antihypertension medication prescribed at discharge for patients with history of hypertension disease or hypertension disease documented during the hospitalization                          |
| Hypoglycemia medication for diabetes                                           | Hypoglycemic medication prescribed at discharge for patients with history of diabetes mellitus or diabetes mellitus documented during the hospitalization                                    |
| Statin for lowering low-density lipoprotein $\geq 100$ mg/dL or not documented | Statin prescribed at discharge if low-density lipoprotein (LDL) $\geq 100$ mg/dL, if patient treated with lipid lowering agent prior to admission, or LDL not documented.                    |

|                                |                                                                                                            |
|--------------------------------|------------------------------------------------------------------------------------------------------------|
| Smoking cessation intervention | Smoking cessation intervention (counseling or medication) prior to discharge for current or recent smokers |
|--------------------------------|------------------------------------------------------------------------------------------------------------|

Eligible patients are those without any medical contraindications (e.g., treatment intolerance, excessive risk of adverse reaction, patient/family refusal, or terminal illness/comfort care only) documented as reasons for non-treatment for each of the applicable measures. Acute performance measures, except for rt-PA measure, exclude patients who died before the end of hospital day two. Performance measures at discharge exclude patients who died during hospitalization.



**eTable 3. Trend analysis of quality measurement**

| Variables                                   | 2015<br>(N=26173<br>[2.6%]) | 2016<br>(N=220403<br>[21.9%]) | 2017<br>(N=253971<br>[25.2%]) | 2018<br>(N=319014<br>[31.7%]) | 2019<br>(N=187237<br>[18.6%]) | Relative<br>Increase<br>from 2015 to 2019<br>% (95%CI) | P <sub>trend</sub> | Adjusted<br>P <sub>trend</sub> | NIHSS-<br>Adjusted<br>P <sub>trend</sub> |
|---------------------------------------------|-----------------------------|-------------------------------|-------------------------------|-------------------------------|-------------------------------|--------------------------------------------------------|--------------------|--------------------------------|------------------------------------------|
| Admission performance measures <sup>a</sup> |                             |                               |                               |                               |                               |                                                        |                    |                                |                                          |
| IV rt-PA ≤ 4.5h                             | 658 (17.9)                  | 5949 (16.5)                   | 9290 (21.0)                   | 16270 (24.2)                  | 11582 (28.7)                  | 60.3 (52.9 to 70.5)                                    | <0.001             | <0.001                         | <0.001                                   |
| Early antithrombotics                       | 18657 (84.6)                | 165093 (86.2)                 | 190324 (85.0)                 | 241213 (84.4)                 | 145122 (85.7)                 | 1.3 (0.9 to 1.7)                                       | <0.001             | 0.32                           | 0.21                                     |
| DVT prophylaxis                             | 3837 (16.2)                 | 12379 (16.9)                  | 14439 (17.2)                  | 18197 (18.0)                  | 9755 (18.4)                   | 13.6 (12.7 to 15.3)                                    | <0.001             | <0.001                         | <0.001                                   |
| Dysphagia screen                            | 17455 (66.7)                | 155507 (70.6)                 | 177773 (70.0)                 | 236666 (74.2)                 | 143317 (76.5)                 | 14.7 (14 to 15.6)                                      | <0.001             | <0.001                         | <0.001                                   |
| Rehabilitation                              | 17848 (68.2)                | 152628 (69.2)                 | 180663 (71.1)                 | 234963 (73.7)                 | 135373 (72.3)                 | 6.0 (5.4 to 6.7)                                       | <0.001             | <0.001                         | <0.001                                   |
| Discharge Performance Measures <sup>a</sup> |                             |                               |                               |                               |                               |                                                        |                    |                                |                                          |
| Antithrombotics                             | 19122 (88.0)                | 168495 (89.1)                 | 195087 (88.1)                 | 246947 (87.3)                 | 147997 (88.1)                 | 0.1 (-0.1 to 0.5)                                      | <0.001             | <0.001                         | <0.001                                   |
| Anticoagulants for AF                       | 631 (35.4)                  | 4910 (37.0)                   | 6284 (40.1)                   | 8739 (43.6)                   | 5256 (46.5)                   | 31.4 (25.7 to 37.3)                                    | <0.001             | <0.001                         | <0.001                                   |
| BP lowering for HTN                         | 13547 (68.6)                | 107294 (65.4)                 | 126775 (66.5)                 | 158471 (66.1)                 | 92957 (65.9)                  | -3.9 (-4.5 to -3.5)                                    | 0.29               | 0.46                           | 0.01                                     |
| Glucose-lowering for hyperglycemia          | 5019 (77.1)                 | 41699 (78.1)                  | 50233 (78.3)                  | 65008 (77.8)                  | 38418 (78.1)                  | 1.3 (0.5 to 2.1)                                       | <0.001             | <0.001                         | <0.001                                   |
| Statin for LDL ≥ 100 or ND                  | 19909 (89.7)                | 174140 (90.4)                 | 202084 (89.6)                 | 256782 (89.1)                 | 153961 (90.1)                 | 0.4 (0.1 to 0.7)                                       | <0.001             | <0.001                         | <0.001                                   |
| Smoking cessation intervention              | 6211 (96.4)                 | 49819 (95.7)                  | 55915 (96.1)                  | 70069 (96.0)                  | 40398 (96.3)                  | -0.1 (-0.5 to 0.1)                                     | <0.001             | <0.001                         | <0.001                                   |
| Summary measures <sup>a</sup>               |                             |                               |                               |                               |                               |                                                        |                    |                                |                                          |
| Composite score                             | 0.75 ± 0.23                 | 0.75 ± 0.23                   | 0.75 ± 0.22                   | 0.76 ± 0.22                   | 0.77 ± 0.22                   | 2.6 (2.3 to 2.8)                                       | <0.001             | <0.001                         | <0.001                                   |
| All-or-none                                 | 7004 (26.8)                 | 56160 (25.5)                  | 63520 (25.0)                  | 83618 (29.5)                  | 51866 (27.7)                  | 3.4 (2.2 to 5.0)                                       | <0.001             | <0.001                         | 0.02                                     |

Abbreviations: IS indicates ischemic stroke; TIA, transient ischemic attack; ICH, intracerebral hemorrhage; SAH, subarachnoid hemorrhage; SNC, stroke not classified;

IV rt-PA, Intravenous recombinant tissue plasminogen activator; DVT, deep vein thrombosis; AF, atrial fibrillation; HTN, hypertension; LDL, low-density lipoprotein; and ND, not documented.

<sup>a</sup> measures were assessed among eligible patients only.

**eTable 4. Trend analysis of in-hospital outcomes**

| Variables                           | 2015<br>(N=26173<br>[2.6%]) | 2016<br>(N=220403<br>[21.9%]) | 2017<br>(N=253971<br>[25.2%]) | 2018<br>(N=319014<br>[31.7%]) | 2019<br>(N=187237<br>[18.6%]) | Relative change<br>from 2015 to 2019<br>% (95% CI) | P <sub>trend</sub> | Adjusted<br>P <sub>trend</sub> | NIHSS-Adjusted<br>P <sub>trend</sub> |
|-------------------------------------|-----------------------------|-------------------------------|-------------------------------|-------------------------------|-------------------------------|----------------------------------------------------|--------------------|--------------------------------|--------------------------------------|
| All stroke/TIA patients             |                             |                               |                               |                               |                               |                                                    |                    |                                |                                      |
| In hospital death/DAMA <sup>a</sup> |                             |                               | 18259 (7.2)                   | 21464 (6.7)                   | 12195 (6.5)                   | -9.7 (-9.6 to -8.5)                                | <.001              | <.001                          | <.001                                |
| In-hospital MACE                    | 1766 (6.8)                  | 13078 (5.9)                   | 15366 (6.1)                   | 21038 (6.6)                   | 12872 (6.9)                   | 1.5 (-1.4 to 7.8)                                  | <.001              | <.001                          | <.001                                |
| In-hospital Complications           | 4451 (17.0)                 | 32848 (14.9)                  | 35383 (13.9)                  | 43082 (13.5)                  | 23163 (12.4)                  | -27.1 (-28.6 to -25.3)                             | <.001              | <.01                           | <.001                                |
| IS                                  |                             |                               |                               |                               |                               |                                                    |                    |                                |                                      |
| In hospital death/DAMA <sup>a</sup> |                             |                               | 12813 (6.1)                   | 15812 (5.9)                   | 9161 (5.7)                    | -6.6 (-6.7 to -6.5)                                | <.0001             | <.001                          | <.001                                |
| In-hospital MACE                    | 1449 (7.0)                  | 10268 (5.8)                   | 12402 (5.9)                   | 17918 (6.7)                   | 11131 (7.0)                   | 0.0 (-4.1 to 1.5)                                  | <.001              | <.001                          | <.001                                |
| In-hospital Complications           | 3255 (15.8)                 | 24456 (13.7)                  | 26749 (12.7)                  | 34238 (12.7)                  | 18723 (11.7)                  | -25.9 (-27 to -24.2)                               | <.001              | <.001                          | <.001                                |
| TIA                                 |                             |                               |                               |                               |                               |                                                    |                    |                                |                                      |
| In hospital death/DAMA <sup>a</sup> |                             |                               | 933 (5.8)                     | 877 (4.5)                     | 545 (4.7)                     | -19.0 (-20.4 to -18.0)                             | <.001              | 0.002                          | NA                                   |
| In-hospital MACE                    | 44 (2.4)                    | 367 (2.3)                     | 339 (2.1)                     | 507 (2.6)                     | 280 (2.4)                     | 0.0 (-12.9 to 23.5)                                | 0.56               | 0.98                           | 0.23                                 |
| In-hospital Complications           | 17 (0.9)                    | 118 (0.7)                     | 110 (0.7)                     | 153 (0.8)                     | 92 (0.8)                      | -11.1 (-28.6 to 20)                                | 0.47               | 0.91                           | 0.66                                 |
| ICH                                 |                             |                               |                               |                               |                               |                                                    |                    |                                |                                      |
| In hospital death/DAMA <sup>a</sup> |                             |                               | 3752 (16.6)                   | 3968 (16.3)                   | 2079 (16.1)                   | -3.0 (-3.8 to -1.2)                                | 0.20               | <.001                          | 0.24                                 |

|                                     |             |             |             |             |             |                        |        |       |       |
|-------------------------------------|-------------|-------------|-------------|-------------|-------------|------------------------|--------|-------|-------|
| In-hospital MACE                    | 219 (6.9)   | 2041 (9.2)  | 2228 (9.8)  | 2241 (9.1)  | 1271 (9.8)  | 42.0 (32.1 to 55.0)    | 0.01   | 0.26  | 0.005 |
| In-hospital Complications           | 1023 (32.4) | 7198 (32.4) | 7277 (31.9) | 7492 (30.5) | 3801 (29.3) | -9.6 (-11.5 to -7.2)   | <.001  | <.001 | 0.96  |
| SAH                                 |             |             |             |             |             |                        |        |       |       |
| In hospital death/DAMA <sup>a</sup> |             |             | 660 (21.4)  | 703 (21.2)  | 323 (20.3)  | -5.1 (-8.5 to -2.6)    | 0.35   | <.001 | 0.01  |
| In-hospital MACE                    | 43 (10.2)   | 344 (12.3)  | 293 (9.5)   | 279 (8.3)   | 123 (7.7)   | -24.5 (-31.3 to -12.3) | <.0001 | <.001 | 0.09  |
| In-hospital Complications           | 130 (30.7)  | 921 (32.9)  | 1041 (33.8) | 991 (29.6)  | 448 (28.1)  | -8.5 (-13.4 to -1.5)   | <.001  | 0.003 | 0.57  |
| SNC                                 |             |             |             |             |             |                        |        |       |       |
| In hospital death/DAMA <sup>a</sup> |             |             | 101 (5.9)   | 104 (4.6)   | 87 (7.9)    | 33.9 (31.3 to 35.7)    | 0.070  | 0.33  | NA    |
| In-hospital MACE                    | 11 (8.0)    | 58 (4.0)    | 104 (6.0)   | 93 (4.1)    | 67 (6.1)    | -23.8 (-40.5 to 34.3)  | 0.56   | 0.19  | 0.82  |
| In-hospital Complications           | 26 (19.0)   | 155 (10.6)  | 206 (12.0)  | 208 (9.2)   | 99 (9.0)    | -52.6 (-58 to -41.1)   | 0.001  | 0.18  | 0.029 |

Abbreviations: IS indicates ischemic stroke; TIA: transient ischemic attack; ICH: intracerebral hemorrhage; SAH: subarachnoid hemorrhage; SNC: stroke not classified; DAMA: discharge against medical advice; MACE: major adverse cardiovascular event;

<sup>a</sup>As DAMA were not warned when it was missing in the system before 2017; therefore, over 90% of them were missing. As thus, the trend analyses were assessed starting from 2017.

**eTable 5. Variations of performance measures at hospital level.**

| Variables                          | IS<br>median (IQR) | TIA<br>median (IQR) | ICH<br>median (IQR) | SAH<br>median (IQR) | SNC<br>median (IQR) |
|------------------------------------|--------------------|---------------------|---------------------|---------------------|---------------------|
| Admission performance measures     |                    |                     |                     |                     |                     |
| IV-rtPA ≤ 4.5h                     | 16.9 (5.6–33.3)    | NA                  | NA                  | NA                  | NA                  |
| Early antithrombotics              | 87.7 (76.1–93.9)   | 90.0 (75.0–98.2)    | NA                  | NA                  | NA                  |
| DVT prophylaxis                    | 7.7 (1.9–20.9)     | NA                  | 0.0 (0.0–21.1)      | 0.0 (0.0–10.0)      | 0.0 (0.0–0.0)       |
| Dysphagia screen                   | 82.8 (66.1–92.7)   | NA                  | 80.0 (57.9–93.6)    | 75.0 (46.7–100.0)   | 71.4 (28.6–100.0)   |
| Rehabilitation                     | 81.1 (61.3–92.8)   | NA                  | 76.3 (55.6–92.6)    | 55.6 (16.7–100.0)   | 78.0 (25.0–100.0)   |
| Discharge performance measures     |                    |                     |                     |                     |                     |
| Antithrombotics                    | 90.1 (81.4–95.0)   | 92.9 (80.0–100.0)   | NA                  | NA                  | NA                  |
| Anticoagulants for AF              | 37.5 (22.6–52.5)   | 33.3 (0.0–66.7)     | NA                  | NA                  | NA                  |
| BP lowering for HTN                | 64.0 (54.9–72.5)   | 65.0 (50.0–77.8)    | 86.1 (76.9–95.0)    | 78.6 (50.0–100.0)   | 69.1 (33.3–100.0)   |
| Glucose-lowering for hyperglycemia | 79.5 (73.1–85.2)   | 81.8 (66.7–100.0)   | 75.0 (52.0–100.0)   | 66.7 (0.0–100.0)    | 92.7 (40.0–100.0)   |
| Statin for LDL ≥ 100 or ND         | 92.4 (86.2–95.8)   | 94.9 (85.7–100.0)   | NA                  | NA                  | NA                  |
| Smoking cessation intervention     | 98.1 (95.1–100.0)  | 100.0 (100.0–100.0) | 100.0 (93.3–100.0)  | 100.0 (100.0–100.0) | 100.0 (100.0–100.0) |
| Summary measures                   |                    |                     |                     |                     |                     |
| Compoiste score                    | 0.8 (0.7–0.8)      | 0.9 (0.8–0.9)       | 0.7 (0.6–0.8)       | 0.6 (0.5–0.7)       | 0.6 (0.5–0.8)       |
| All-or-none                        | 19.4 (10.6–29.5)   | 54.5 (40.7–66.7)    | 25.0 (9.7–41.7)     | 8.0 (0.0–33.3)      | 0.0 (0.0–30.0)      |

Abbreviations: IS indicates ischemic stroke; TIA, transient ischemic attack; ICH, intracerebral hemorrhage; SAH, subarachnoid hemorrhage; SNC, stroke not classified; IQR, interquartile range; IV-rtPA, Intravenous recombinant tissue plasminogen activator; DVT, deep vein thrombosis; AF, atrial fibrillation; HTN, hypertension; LDL, low-density lipoprotein; ND, not documented; and NA, not applicable.

**eTable 6. Variations of stroke-related in-hospital outcomes and complications at hospital level.**

| <b>Variables</b>          | IS<br>median (IQR) | TIA<br>median (IQR) | ICH<br>median (IQR) | SAH<br>median (IQR) | SNC<br>median (IQR) |
|---------------------------|--------------------|---------------------|---------------------|---------------------|---------------------|
| In hospital death/DAMA    | 3.5 (1.2–7.0)      | 0.0 (0.0–5.5)       | 5.2 (0.0–14.3)      | 0.0 (0.0–25.0)      | 0.0 (0.0–0.0)       |
| In-hospital MACE          | 5.6 (2.9–9.6)      | 20.0 (0.0–50.0)     | 6.8 (0.0–15.0)      | 0.0 (0.0–11.4)      | 0.0 (0.0–4.0)       |
| Length of stay            | 11.5 (10.1–12.9)   | 8.1 (6.8–9.5)       | 14.9 (12.6–18.1)    | 13.2 (9.0–17.6)     | 9.4 (7.0–13.0)      |
| In-hospital Complications | 12.0 (7.7–17.6)    | 0.0 (0.0–8.3)       | 24.7 (13.3–38.1)    | 21.4 (0.0–47.3)     | 0.0 (0.0–25.0)      |

Abbreviations: IS indicates ischemic stroke; TIA, transient ischemic attack; ICH, intracerebral hemorrhage; SAH, subarachnoid hemorrhage; SNC, stroke not classified; IQR , interquartile range; DAMA, discharge against medical advice; and MACE, major adverse cardiovascular event.

**eTable 7. Performance measures by localization.**

| Variables                          | Rural<br>(N=418545 [41.6%]) |                  | Urban<br>(N=588253 [58.4%]) |                  | ASD (%) <sup>a</sup> |
|------------------------------------|-----------------------------|------------------|-----------------------------|------------------|----------------------|
|                                    | Relative frequency          | % (95% CI)       | Relative frequency          | % (95% CI)       |                      |
| Admission performance measures     |                             |                  |                             |                  | %                    |
| IV-rtPA ≤ 4.5h                     | 16153/80032                 | 20.2 (19.9–20.5) | 27845/107606                | 25.9 (25.6–26.1) | 13.6                 |
| Early antithrombotics              | 316546/366052               | 86.5 (86.4–86.6) | 444419/520855               | 85.3 (85.2–85.4) | 3.4                  |
| DVT prophylaxis                    | 24648/127925                | 19.3 (19.1–19.5) | 33959/192418                | 17.7 (17.5–17.8) | 4.1                  |
| Dysphagia screen                   | 300558/389491               | 77.2 (77.0–77.3) | 430160/548711               | 78.4 (78.3–78.5) | 2.9                  |
| Rehabilitation                     | 299553/418420               | 71.6 (71.5–71.7) | 421922/587959               | 71.8 (71.7–71.9) | 0.4                  |
| Discharge performance measures     |                             |                  |                             |                  |                      |
| Antithrombotics                    | 324714/379517               | 85.6 (85.5–85.7) | 456664/539158               | 84.7 (84.6–84.8) | 2.5                  |
| Anticoagulants for AF              | 8773/19787                  | 44.3 (43.7–45.0) | 17206/33917                 | 50.7 (50.2–51.3) | 12.8                 |
| BP lowering for HTN                | 205093/256054               | 80.1 (79.9–80.3) | 293951/363062               | 81.0 (80.8–81.1) | 2.3                  |
| Glucose-lowering for hyperglycemia | 72860/83714                 | 87.0 (86.8–87.3) | 127517/147256               | 86.6 (86.4–86.8) | 1.2                  |
| Statin for LDL≥100 or ND           | 346633/408296               | 84.9 (84.8–85.0) | 482278/573913               | 84.0 (83.9–84.1) | 2.5                  |
| Smoking cessation intervention     | 81904/84870                 | 96.5 (96.4–96.6) | 140508/146192               | 96.1 (96.0–96.2) | 2.1                  |
| Summary measures                   |                             |                  |                             |                  |                      |
| Composite score                    |                             | 0.76±0.22        |                             | 0.75±0.22        | 4.5                  |
| All-or-none                        | 111588/418540               | 26.7 (26.5–26.8) | 150580/588226               | 25.6 (25.5–25.7) | 2.5                  |

Abbreviations: IS indicates ischemic stroke; TIA, transient ischemic attack; ICH, intracerebral hemorrhage; SAH, subarachnoid hemorrhage; SNC, stroke not classified; IV-rtPA, Intravenous recombinant tissue plasminogen activator; DVT, deep vein thrombosis; AF, atrial fibrillation; HTN, hypertension; LDL, low-density lipoprotein; ND, not documented; ASD, absolute standard difference.

<sup>a</sup>an ASD of greater than ten is considered clinically significant.

**Table 8. Stroke-related in-hospital outcomes and complications by localization.**

| Variables                                     | Rural<br>(N=418545 [41.6%]) |                  | Urban<br>(N=588253 [58.4%]) |                  | ASD<br>(%) <sup>a</sup> |
|-----------------------------------------------|-----------------------------|------------------|-----------------------------|------------------|-------------------------|
|                                               | Relative frequency          | % (95% CI)       | Relative frequency          | % (95% CI)       |                         |
| In hospital death/DAMA                        | 2 5018/322784               | 7.8 (7.7–7.8)    | 29677/450681                | 6.6 (6.5–6.7)    | 4.6                     |
| In-hospital death                             | 1562/418545                 | 0.4 (0.4–0.4)    | 4616/588253                 | 0.8 (0.8–0.8)    | 5.2                     |
| DAMA                                          | 23456/321222                | 7.3 (7.2–7.4)    | 25061/446065                | 5.6 (5.6–5.7)    | 6.9                     |
| In-hospital CVD events                        | 26007/418545                | 6.2 (6.1–6.3)    | 38113/588253                | 6.5 (6.4–6.5)    | 1.2                     |
| Cerebral infarction                           | 17299/418545                | 4.1 (4.1–4.2)    | 26298/588253                | 4.5 (4.4–4.5)    | 2.0                     |
| Cerebral hemorrhage                           | 6566/418545                 | 1.6 (1.5–1.6)    | 9177/588253                 | 1.6 (1.5–1.6)    | 0.0                     |
| TIA                                           | 3385/418545                 | 0.8 (0.8–0.8)    | 4587/588253                 | 0.8 (0.8–0.8)    | 0.0                     |
| Myocardial infarction                         | 1357/418545                 | 0.3 (0.3–0.3)    | 2400/588253                 | 0.4 (0.4–0.4)    | 1.7                     |
| In-hospital Complications                     | 53582/418545                | 12.8 (12.7–12.9) | 85345/588253                | 14.5 (14.4–14.6) | 5.0                     |
| DVT                                           | 3280/418545                 | 0.8 (0.8–0.8)    | 5832/588253                 | 1.0 (1.0–1.0)    | 2.1                     |
| Pneumonia                                     | 38953/418545                | 9.3 (9.2–9.4)    | 63014/588253                | 10.7 (10.6–10.8) | 4.7                     |
| Pulmonary embolism                            | 736/418545                  | 0.2 (0.2–0.2)    | 1324/588253                 | 0.2 (0.2–0.2)    | 0.0                     |
| Epileptic Seizure                             | 2402/418545                 | 0.6 (0.6–0.6)    | 3841/588253                 | 0.7 (0.6–0.7)    | 1.2                     |
| Hydrocephalus                                 | 1462/418545                 | 0.4 (0.3–0.4)    | 2522/588253                 | 0.4 (0.4–0.5)    | 0.0                     |
| Urinary infection                             | 4628/418545                 | 1.1 (1.1–1.1)    | 8642/588253                 | 1.5 (1.4–1.5)    | 3.5                     |
| Respiratory failure or cardiopulmonary arrest | 1561/418545                 | 0.4 (0.4–0.4)    | 3543/588253                 | 0.6 (0.6–0.6)    | 2.8                     |
| Bedsore                                       | 1286/418545                 | 0.3 (0.3–0.3)    | 2055/588253                 | 0.4 (0.3–0.4)    | 1.7                     |
| Depression                                    | 5233/418545                 | 1.3 (1.2–1.3)    | 7312/588253                 | 1.2 (1.2–1.3)    | 0.9                     |
| Gastrointestinal bleeding                     | 3872/418545                 | 0.9 (0.9–1.0)    | 6885/588253                 | 1.2 (1.1–1.2)    | 2.9                     |

Abbreviations: DAMA, discharge against medical advice; and MACE, major adverse cardiovascular event, and DVT, deep vein thrombosis.

<sup>a</sup> absolute standard difference , an ASD of greater than ten is considered clinically significant.
